# Supplementary material
Source: Springer Nature journal article supplement (https://www.springerprofessional.de/resource/supplementary/13673_2011_19_MOESM5_ESM.pdf/11899324)

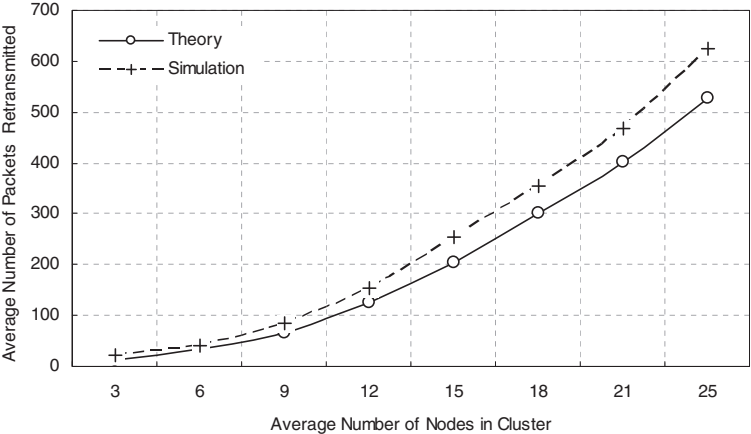

Supplement: MOESM5 [file 11899324]
